# Supplementary material for: Plasma Level of Placenta-Derived Macrophage-Stimulating Protein -Chain in Preeclampsia before 20 Weeks of Pregnancy
Source: PubMed Central journal article supplement (PMC4999075; doi:10.1371/journal.pone.0161626), 2016-08-25
Supplement: pone.0161626.s007.pdf [file pone.0161626.s007.pdf]

# Anti-MST1 antibody [EPR6207] ab124787

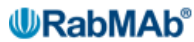

## 2 图像

### 概述

|       |                                                                                                                                                                                                                              |
|-------|------------------------------------------------------------------------------------------------------------------------------------------------------------------------------------------------------------------------------|
| 产品名称  | Anti-MST1抗体[EPR6207]                                                                                                                                                                                                         |
| 描述    | 兔单克隆抗体[EPR6207] to MST1                                                                                                                                                                                                      |
| 经测试应用 | WB, IHC-P, Flow Cyt                                                                                                                                                                                                          |
| 种属反应性 | 与反应: Mouse, Rat, Human                                                                                                                                                                                                       |
| 免疫原   | Synthetic peptide corresponding to residues in Human MST1.                                                                                                                                                                   |
| 阳性对照  | HepG2, 293T and Caco-2 cell lysates. Human liver carcinoma tissue.                                                                                                                                                           |
| 常规说明  | This product is a recombinant rabbit monoclonal antibody.<br>Produced using Abcam's RabMAb <sup>®</sup> technology. RabMAb <sup>®</sup> technology is covered by the following U.S. Patents, No. 5,675,063 and/or 7,429,487. |

### 性能

|      |                                                                |
|------|----------------------------------------------------------------|
| 形式   | Liquid                                                         |
| 存放说明 | Shipped at 4°C. Store at -20°C. Stable for 12 months at -20°C. |
| 存储溶液 | PBS 49%,Sodium azide 0.01%,Glycerol 50%,BSA 0.05%              |
| 纯度   | Tissue culture supernatant                                     |
| 克隆   | 单克隆                                                            |
| 克隆编号 | EPR6207                                                        |
| 同种型  | IgG                                                            |

### 应用

Our [Abpromise guarantee](#) covers the use of **ab124787** in the following tested applications.

The application notes include recommended starting dilutions; optimal dilutions/concentrations should be determined by the end user.

| 应用 | Abreviews | 说明                                                                                             |
|----|-----------|------------------------------------------------------------------------------------------------|
| WB |           | 1/1000 - 1/10000. Detects a band of approximately 85 kDa (predicted molecular weight: 80 kDa). |

| 应用       | Abreviews                                                                                                                                                                 | 说明                                                                                                                           |
|----------|---------------------------------------------------------------------------------------------------------------------------------------------------------------------------|------------------------------------------------------------------------------------------------------------------------------|
| IHC-P    |                                                                                                                                                                           | 1/50 - 1/100. Perform heat mediated antigen retrieval before commencing with IHC staining protocol.                          |
| Flow Cyt |                                                                                                                                                                           | 1/10 - 1/100. <a href="#">ab172730</a> -Rabbit monoclonal IgG, is suitable for use as an isotype control with this antibody. |
| 应用说明     | Is unsuitable for ICC or IP.                                                                                                                                              |                                                                                                                              |
| 靶标       |                                                                                                                                                                           |                                                                                                                              |
| 功能       | Probably has no proteolytic activity, since crucial characteristic of serine proteases catalytic sites are not conserved.                                                 |                                                                                                                              |
| 序列相似性    | <p>Belongs to the peptidase S1 family. Plasminogen subfamily.</p> <p>Contains 4 kringle domains.</p> <p>Contains 1 PAN domain.</p> <p>Contains 1 peptidase S1 domain.</p> |                                                                                                                              |
| 翻译后修饰    | May be cleaved after Arg-483, to yield two chains held together by disulfide bonds, or two separate polypeptides.                                                         |                                                                                                                              |
| 细胞定位     | Secreted.                                                                                                                                                                 |                                                                                                                              |

#### Anti-MST1 antibody [EPR6207] 图像

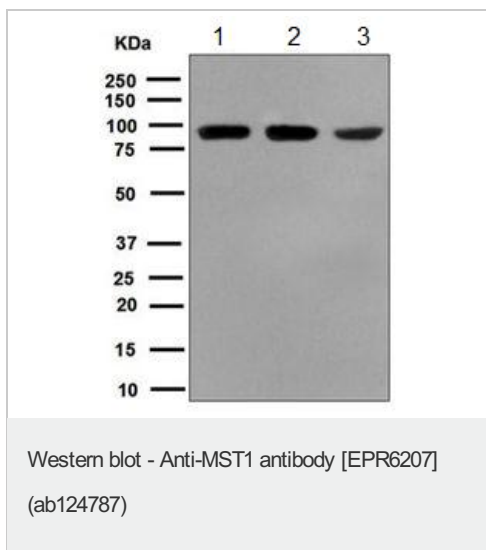

**All lanes :** Anti-MST1 antibody [EPR6207]  
(ab124787) at 1/1000 dilution

**Lane 1 :** HepG2 cell lysate

**Lane 2 :** 293T cell lysate

**Lane 3 :** Caco-2 cell lysate

Lysates/proteins at 10 µg per lane.

#### Secondary

Standard HRP labelled goat anti-rabbit at  
1/2000 dilution

**Predicted band size :** 80 kDa

**Observed band size :** 85 kDa

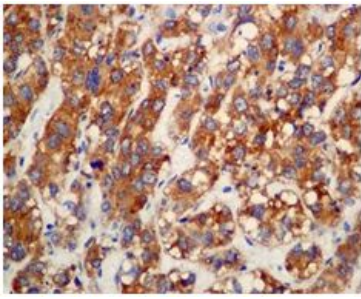

ab124787 at 1/50 dilution staining MST1 in paraffin-embedded Human liver carcinoma tissues by Immunohistochemistry.

Immunohistochemistry (Formalin/PFA-fixed paraffin-embedded sections) - Anti-MST1 antibody [EPR6207] (ab124787)

**Please note:** All products are "FOR RESEARCH USE ONLY AND ARE NOT INTENDED FOR DIAGNOSTIC OR THERAPEUTIC USE"

### **Our Abpromise to you: Quality guaranteed and expert technical support**

- Replacement or refund for products not performing as stated on the datasheet
- Valid for 12 months from date of delivery
- Response to your inquiry within 24 hours
  
- We provide support in Chinese, English, French, German, Japanese and Spanish
- Extensive multi-media technical resources to help you
- We investigate all quality concerns to ensure our products perform to the highest standards

If the product does not perform as described on this datasheet, we will offer a refund or replacement. For full details of the Abpromise, please visit <http://www.abcam.cn/abpromise> or contact our technical team.

### **Terms and conditions**

- Guarantee only valid for products bought direct from Abcam or one of our authorized distributors
