# Supplementary material for: Plasma Level of Placenta-Derived Macrophage-Stimulating Protein -Chain in Preeclampsia before 20 Weeks of Pregnancy
Source: PubMed Central journal article supplement (PMC4999075; doi:10.1371/journal.pone.0161626), 2016-08-25
Supplement: pone.0161626.s008.pdf [file pone.0161626.s008.pdf]

Product datasheet

Anti-RON antibody [EP1132Y] ab52927

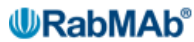

★★★★☆ 1 Abreviews | 1 References | 3 图像

概述

|              |                                                                                 |
|--------------|---------------------------------------------------------------------------------|
| <b>产品名称</b>  | Anti-RON抗体[EP1132Y]                                                             |
| <b>描述</b>    | 兔单克隆抗体[EP1132Y] to RON                                                          |
| <b>经测试应用</b> | WB, IP, Flow Cyt, IHC-P, ICC/IF                                                 |
| <b>种属反应性</b> | 与反应: Human                                                                      |
| <b>免疫原</b>   | A synthetic peptide corresponding to residues near the N-terminus of human RON. |
| <b>阳性对照</b>  | SKBR3 cell lysate; human stomach tissue.                                        |
| <b>常规说明</b>  | This product is a recombinant rabbit monoclonal antibody.                       |

Produced using Abcam's RabMAb<sup>®</sup> technology. RabMAb<sup>®</sup> technology is covered by the following U.S. Patents, No. 5,675,063 and/or 7,429,487. The major RON transcript is translated into a glycosylated single chain precursor, cleaved into a 185 kDa heterodimer (p185Ron) of 35 (alpha) and 150 kDa (beta) disulfide-linked chains, before exposure at the cell surface.

Mouse, Rat: We have preliminary internal testing data to indicate this antibody may not react with these species. Please contact us for more information.

性能

|             |                                                                |
|-------------|----------------------------------------------------------------|
| <b>形式</b>   | Liquid                                                         |
| <b>存放说明</b> | Shipped at 4°C. Store at -20°C. Stable for 12 months at -20°C. |
| <b>存储溶液</b> | PBS 49%,Sodium azide 0.01%,Glycerol 50%,BSA 0.05%              |
| <b>纯度</b>   | Tissue culture supernatant                                     |
| <b>克隆</b>   | 单克隆                                                            |
| <b>克隆编号</b> | EP1132Y                                                        |
| <b>同种型</b>  | IgG                                                            |

应用

Our [Abpromise guarantee](#) covers the use of **ab52927** in the following tested applications. The application notes include recommended starting dilutions; optimal dilutions/concentrations should be determined by the end user.

| 应用       | Abreviews | 说明                                                                                                                                                                                                                            |
|----------|-----------|-------------------------------------------------------------------------------------------------------------------------------------------------------------------------------------------------------------------------------|
| WB       |           | 1/10000. Detects a band of approximately 35,150,180 kDa (predicted molecular weight: 185 kDa). 1/10000. Detects a band of approximately 35/150/180 kDa (predicted molecular weight: 185 kDa). See Notes section of Datasheet. |
| IP       |           | 1/30.                                                                                                                                                                                                                         |
| Flow Cyt |           | 1/20 - 1/40. (methanol fixed cells)                                                                                                                                                                                           |
|          |           | <a href="#">ab172730</a> -Rabbit monoclonal IgG, is suitable for use as an isotype control with this antibody.                                                                                                                |
| IHC-P    | ★★★★☆     | Use at an assay dependent concentration.                                                                                                                                                                                      |
| ICC/IF   |           | 1/50 - 1/100.                                                                                                                                                                                                                 |

## 靶标

|       |                                                                                                                                                                      |
|-------|----------------------------------------------------------------------------------------------------------------------------------------------------------------------|
| 功能    | Receptor for macrophage stimulating protein (MSP). Has a tyrosine-protein kinase activity.                                                                           |
| 组织特异性 | Keratinocytes and lung.                                                                                                                                              |
| 序列相似性 | Belongs to the protein kinase superfamily. Tyr protein kinase family.<br>Contains 3 IPT/TIG domains.<br>Contains 1 protein kinase domain.<br>Contains 1 Sema domain. |
| 翻译后修饰 | Proteolytic processing yields the two subunits.<br>Phosphorylated in response to ligand binding.                                                                     |
| 细胞定位  | Membrane.                                                                                                                                                            |

## Anti-RON antibody [EP1132Y] 图像

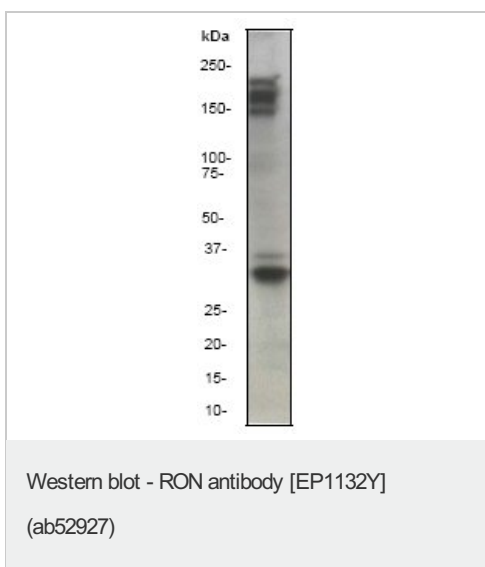

Anti-RON antibody [EP1132Y] (ab52927) at  
1/10000 dilution + SKBR3 cell lysate at 10 µg

### Secondary

HRP-labelled goat anti-rabbit

**Predicted band size : 185 kDa**

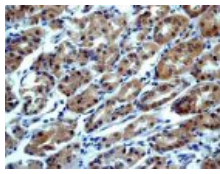

Immunohistochemistry (Paraffin-embedded sections) - RON antibody [EP1132Y] (ab52927)

Immunohistochemical staining of paraffin-embedded human stomach tissue using ab52927 at a dilution of 1/100-1/250.

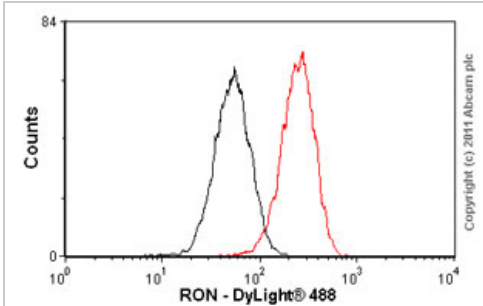

Flow Cytometry - RON antibody [EP1132Y] (ab52927)

Overlay histogram showing THP1 cells stained with ab52927 (red line). The cells were fixed with methanol (5 min) and incubated in 1x PBS / 10% normal goat serum / 0.3M glycine to block non-specific protein-protein interactions. The cells were then incubated with the antibody (ab52927, 1/20 dilution) for 30 min at 22°C. The secondary antibody used was DyLight® 488 goat anti-rabbit IgG (H+L) (ab96899) at 1/500 dilution for 30 min at 22°C. Isotype control antibody (black line) was rabbit monoclonal IgG (1µg/1x10<sup>6</sup> cells) used under the same conditions. Acquisition of >5,000 events was performed. This antibody gave a decreased signal in THP1 cells fixed with 4% paraformaldehyde (10 min) used under the same conditions.

Please note that Abcam do not have any data for use of this antibody in non-fixed cells. We welcome any customer feedback.

**Please note:** All products are "FOR RESEARCH USE ONLY AND ARE NOT INTENDED FOR DIAGNOSTIC OR THERAPEUTIC USE"

### Our Abpromise to you: Quality guaranteed and expert technical support

- Replacement or refund for products not performing as stated on the datasheet
- Valid for 12 months from date of delivery
- Response to your inquiry within 24 hours
- We provide support in Chinese, English, French, German, Japanese and Spanish
- Extensive multi-media technical resources to help you
- We investigate all quality concerns to ensure our products perform to the highest standards

If the product does not perform as described on this datasheet, we will offer a refund or replacement. For full details of the Abpromise, please visit <http://www.abcam.cn/abpromise> or contact our technical team.

### Terms and conditions

- Guarantee only valid for products bought direct from Abcam or one of our authorized distributors
